# Supplementary material
Source: PubMed Central journal article supplement (PMC6615047)
Supplement: NIHMS1502996-supplement-Supp1.pdf [file NIHMS1502996-supplement-Supp1.pdf]

# Supporting Information

## Surface Properties of Laser-treated Molybdenum Disulfide Nanosheets for Optoelectronic Applications

*Abdullah Alrasheed<sup>1</sup>, Justin M. Gorham<sup>2</sup>, Bien Cuong Tran Khac<sup>3</sup>, Fadhel Alsaffar<sup>1</sup>, Frank DelRio<sup>\*4</sup>, Koo-Hyun Chung<sup>\*3</sup>, and Moh. R. Amer<sup>\*1,5</sup>*

<sup>1</sup>Center of Excellence for Green Nanotechnologies,  
Joint Centers of Excellence Program

King Abdulaziz City for Science and Technology, Riyadh, Saudi Arabia

<sup>2</sup>Materials Measurement Science Division,  
Material Measurement Laboratory,

National Institute of Standards and Technology, Gaithersburg, MD 20899, United States

<sup>3</sup>School of Mechanical Engineering

University of Ulsan, Ulsan 44610, South Korea

<sup>4</sup>Applied Chemicals and Materials Division,  
Material Measurement Laboratory,

National Institute of Standards and Technology, Boulder, Colorado 80305, United States

<sup>5</sup>Department of Electrical Engineering

University of California, Los Angeles, Los Angeles, California, 90095

\*Please send all correspondence to [frank.delrio@nist.gov](mailto:frank.delrio@nist.gov), [khchung@ulsan.ac.kr](mailto:khchung@ulsan.ac.kr), and [mamer@seas.ucla.edu](mailto:mamer@seas.ucla.edu)

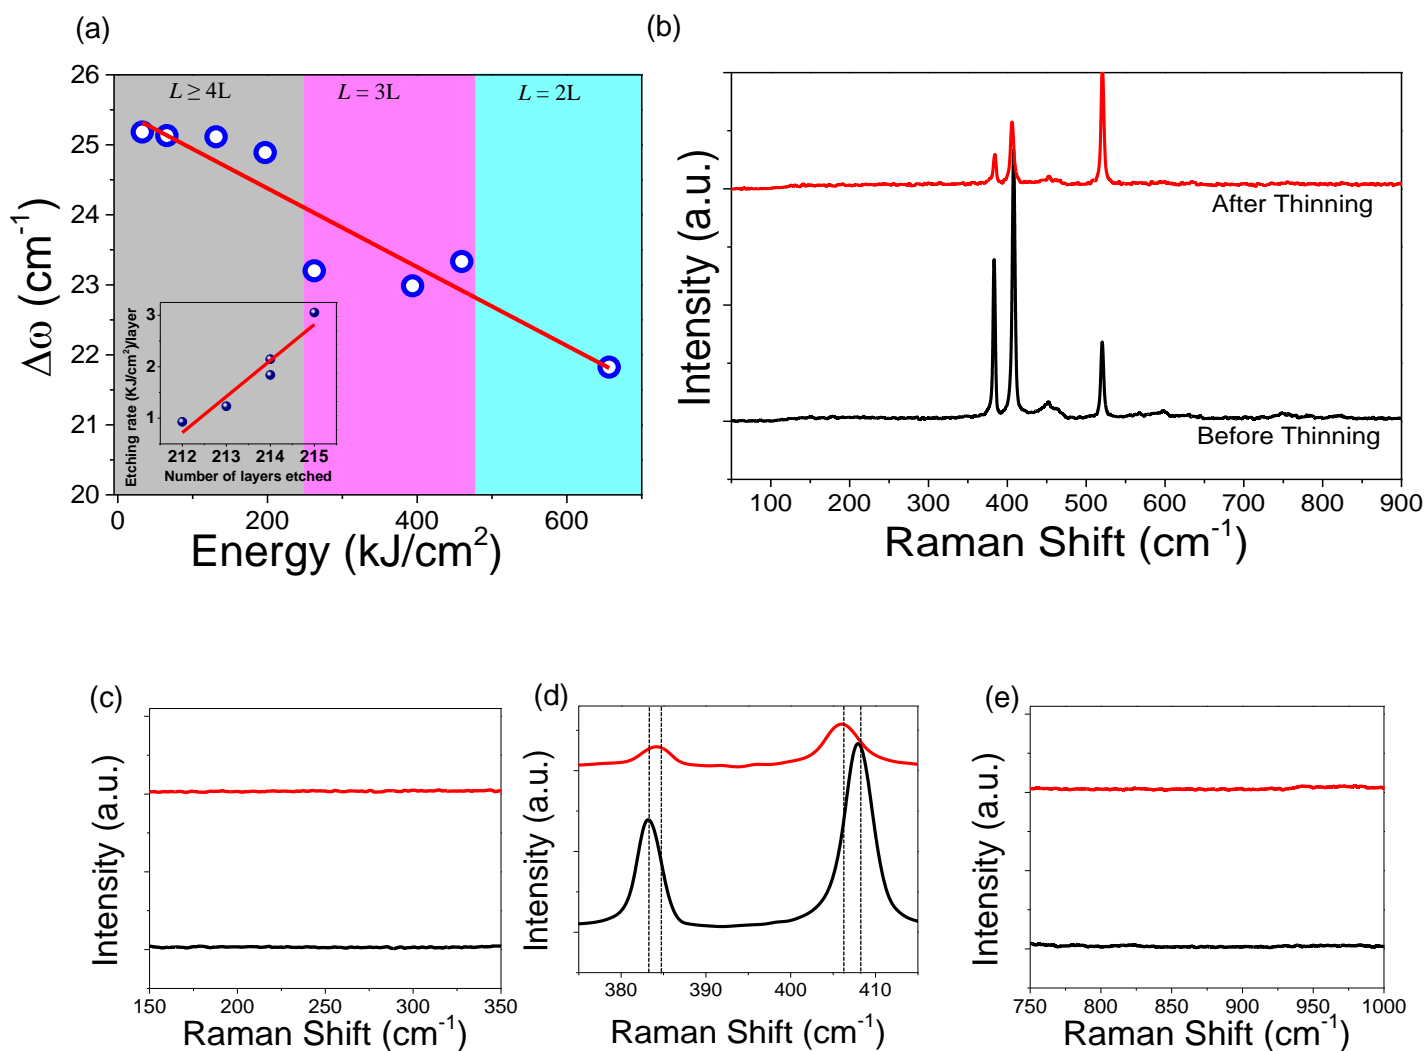

**Figure S1.** (a)  $\Delta\omega$  vs. the energy density of the incident 532nm laser. The fitted red line has a slope of  $5.623 \times 10^{-6}$  and a y intercept of 25.51. The inset shows the varying etching rate as a function of the etched number of layers. (b) Raman spectra before and after laser thinning. (c), (d), and (e) are zoomed in views of the spectra measured before and after laser thinning showing the absence of MoO<sub>3</sub> Raman peaks. The downshift of the A<sub>1g</sub> peak after the treatment indicates successful laser thinning.

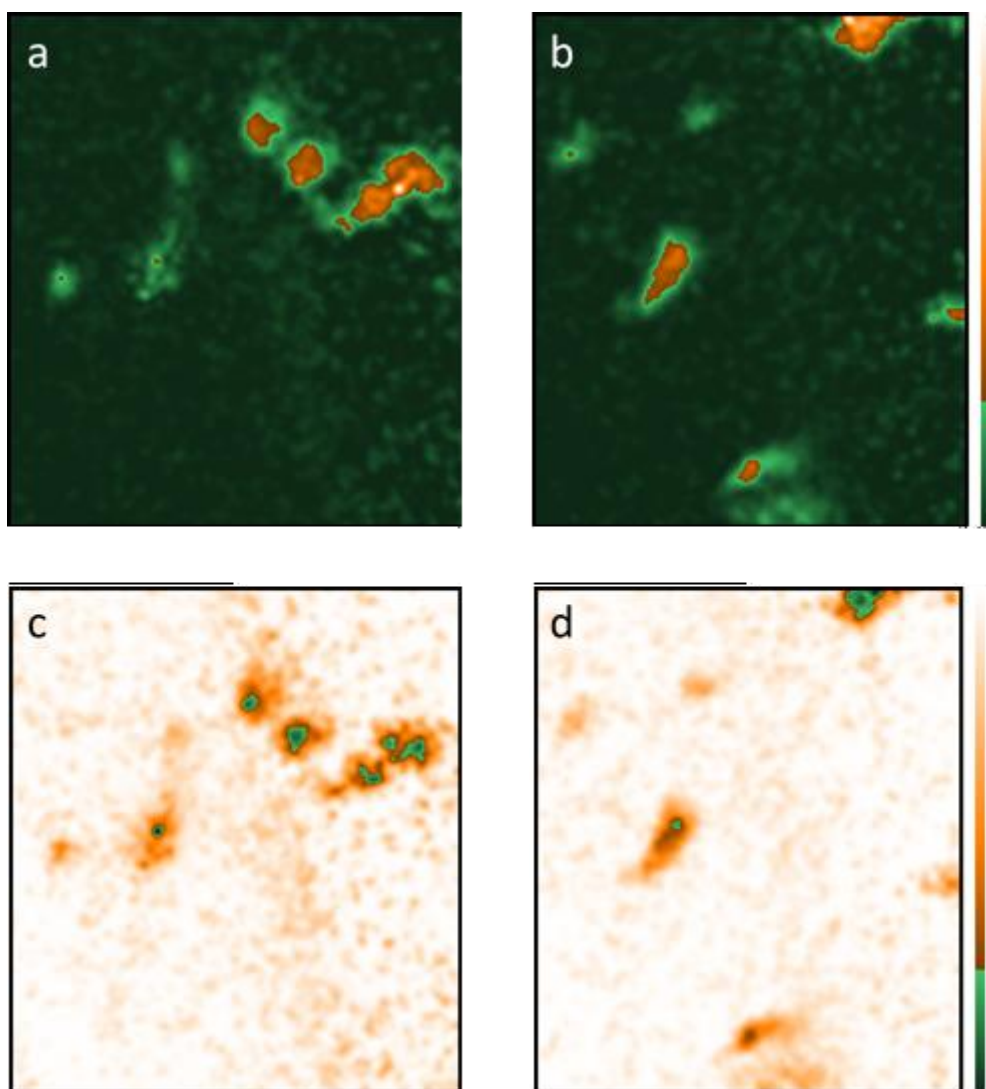

**Figure S2.** Processed MoS<sub>2</sub> 3d<sup>5</sup> image of the laser-treated and untreated MoS<sub>2</sub> nanosheets under (a) ambient and (b) vacuum conditions. Processed Si 2p images under (c) ambient and (d) vacuum conditions. Image size was 161  $\mu\text{m}$   $\times$  178  $\mu\text{m}$  for ambient conditions and 153  $\mu\text{m}$   $\times$  178  $\mu\text{m}$  for vacuum conditions. Images were processed consistent with the Methods in the main text.

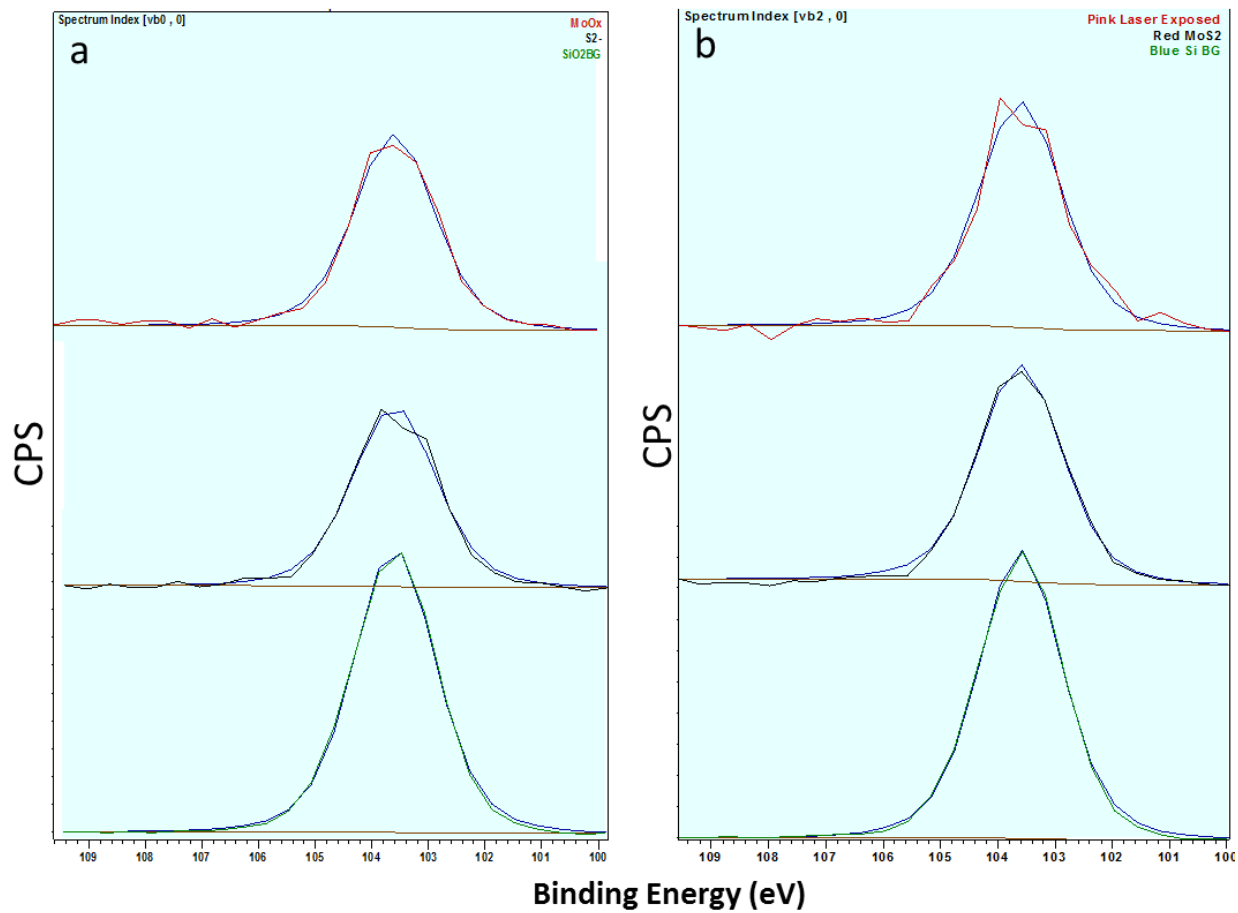

**Figure S3:** Si 2p extracted spectra for (top to bottom) laser-treated MoS<sub>2</sub>, native MoS<sub>2</sub>, and SiO<sub>2</sub> background for the (a) ambient and (b) vacuum conditions.

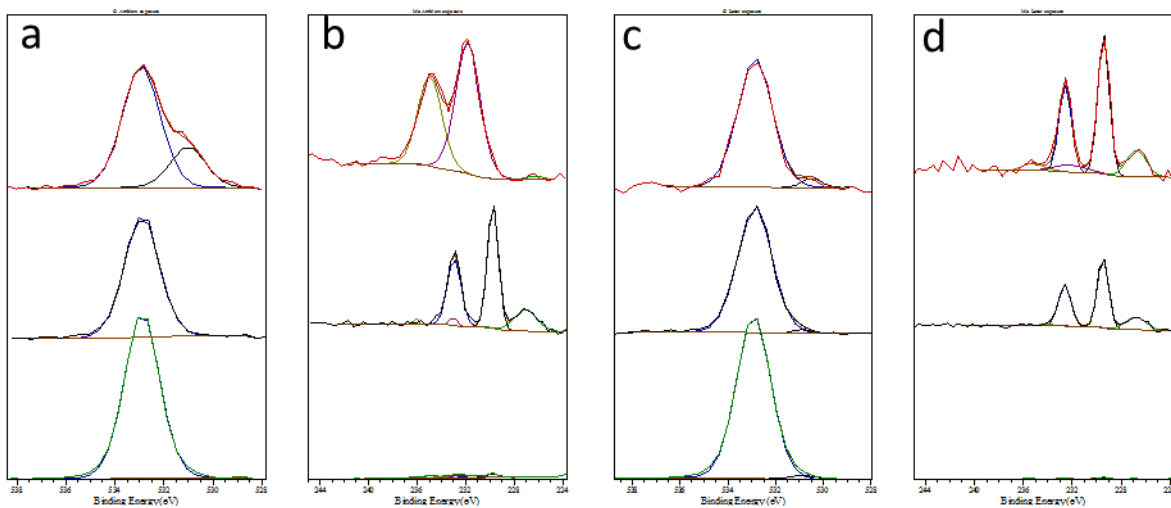

**Figure S4:** (a-d) Fitted spectra extracted from ROIs in the composite map for native and laser-treated MoS<sub>2</sub> nanosheets.

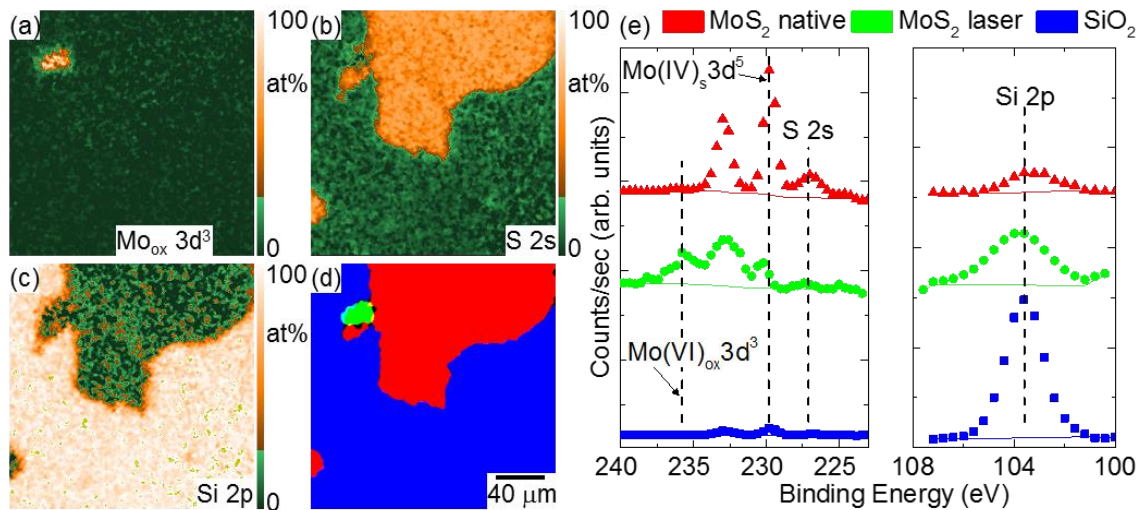

**Figure S5:** Replicate of ambient exposure conditions for *i*-XPS. (a) Mo<sub>ox</sub>, (b) S<sub>sulfide</sub>, (c) Si 2p and (d) composite mask images. (e) Extracted spectra from the raw image stack using the masks for the ROIs.

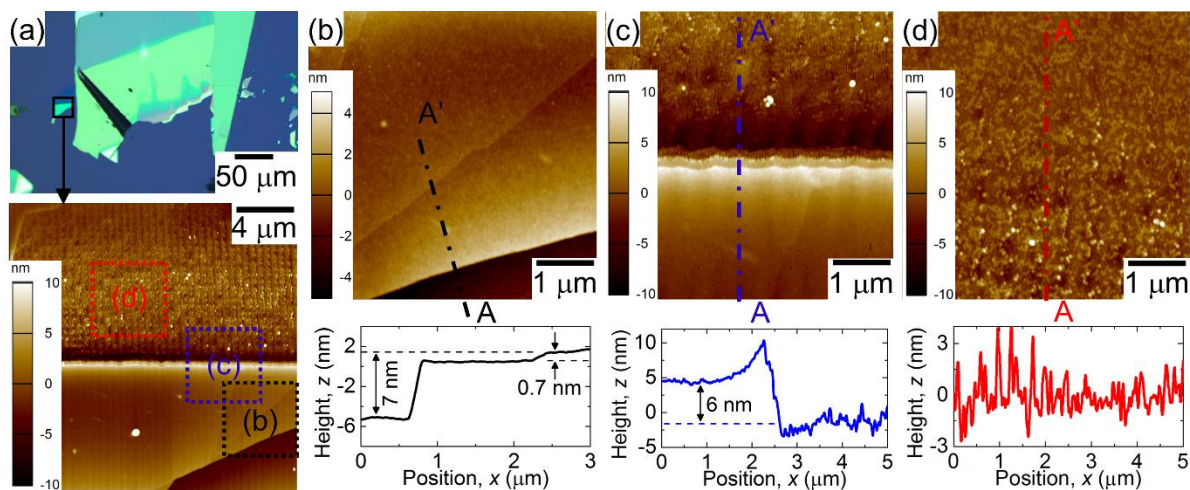

**Figure S6.** (a) Optical and AFM images of laser-thinned MoS<sub>2</sub>. The highlighted part of the optical image shows the location of the nanosheet. AFM images of (b) native MoS<sub>2</sub> before thinning, (c) the edge between native MoS<sub>2</sub> and thinned MoS<sub>2</sub>, and (d) MoS<sub>2</sub> after thinning.

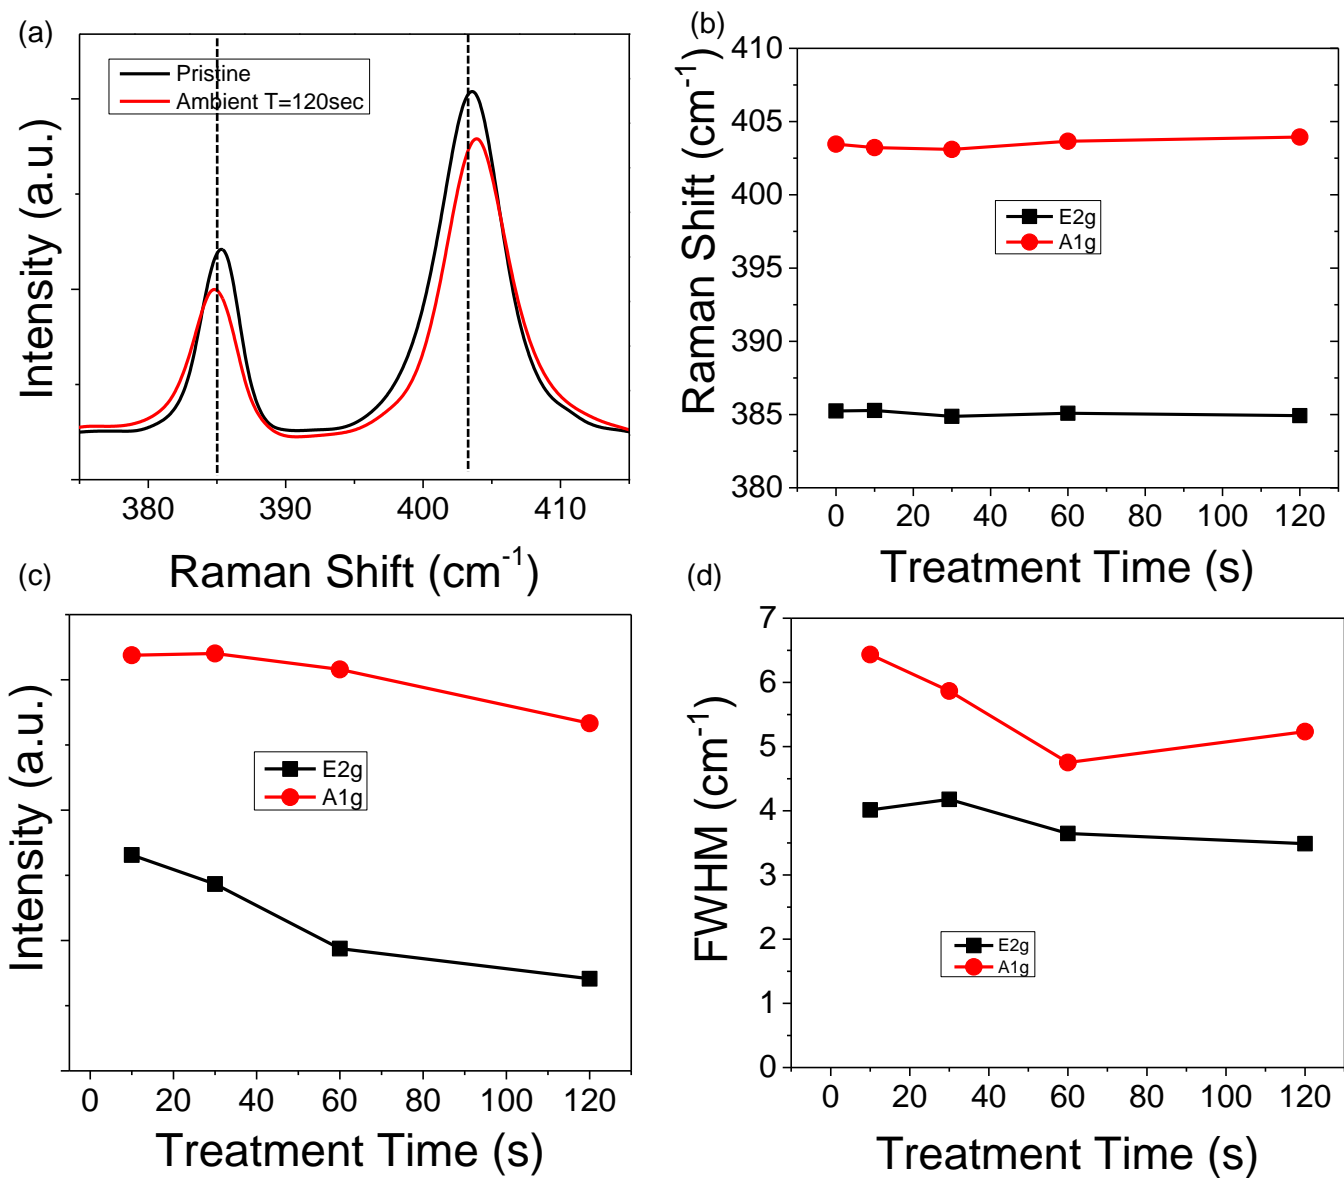

**Figure S7.** (a) Raman spectra before and after laser treatment in ambient conditions. (b) Shift (c) intensity, and (d) FWHM of the  $A_{1g}$  and  $E_{2g}$  vibrational peaks at different treatment times.



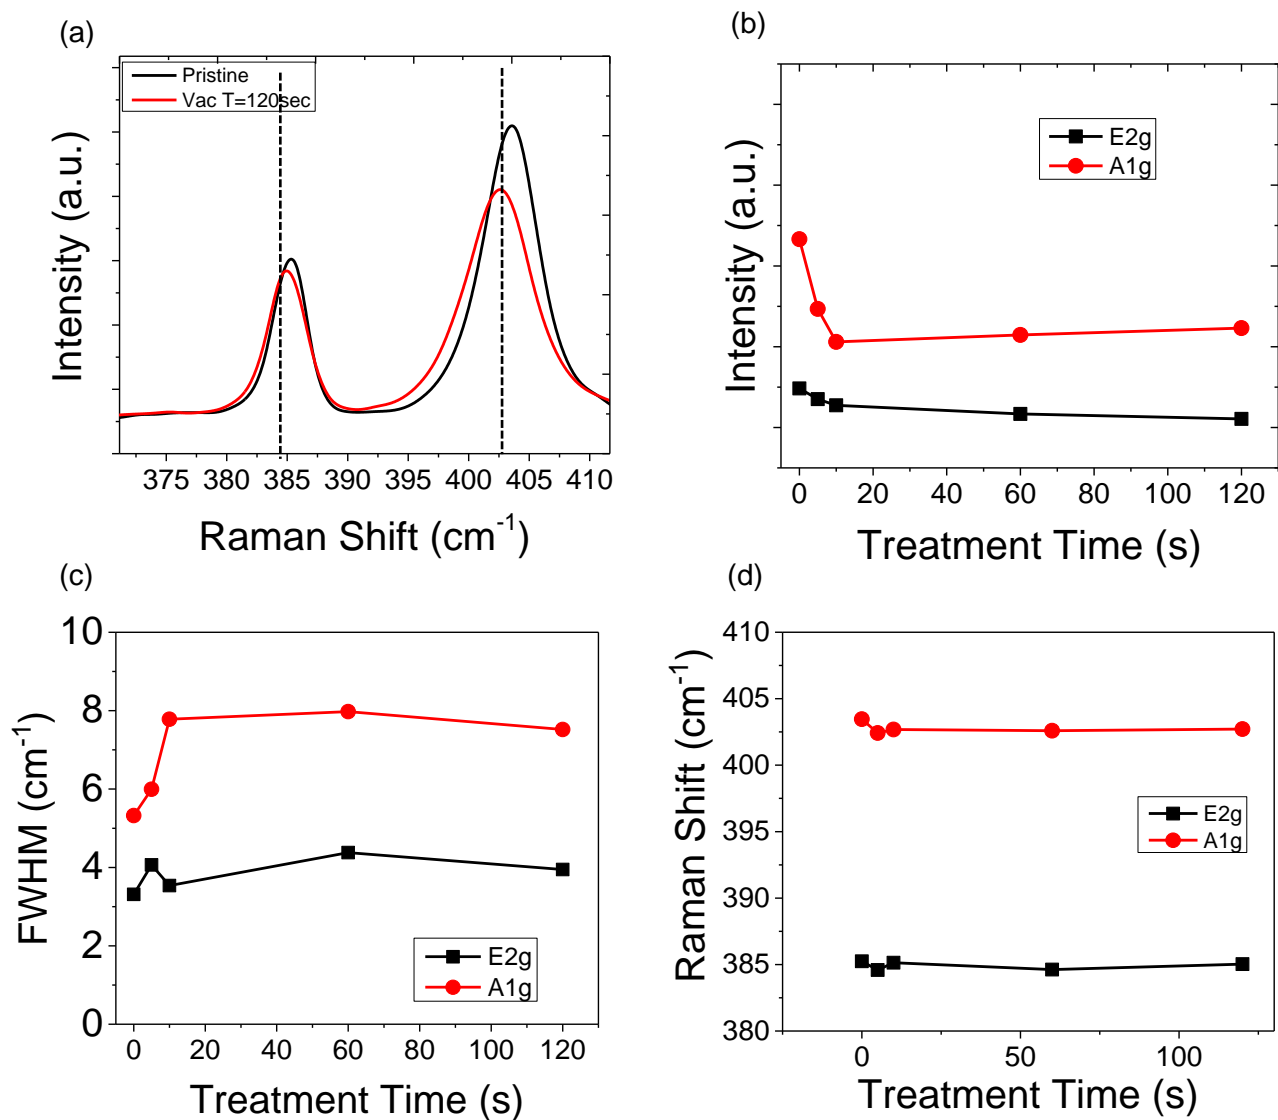

**Figure S8.** (a) Raman spectra before and after laser treatment in vacuum. (b) Intensity (c) FWHM, and (d) shift of the  $\text{A}_{1g}$  and  $\text{E}_{2g}$  vibrational peaks at different treatment times.

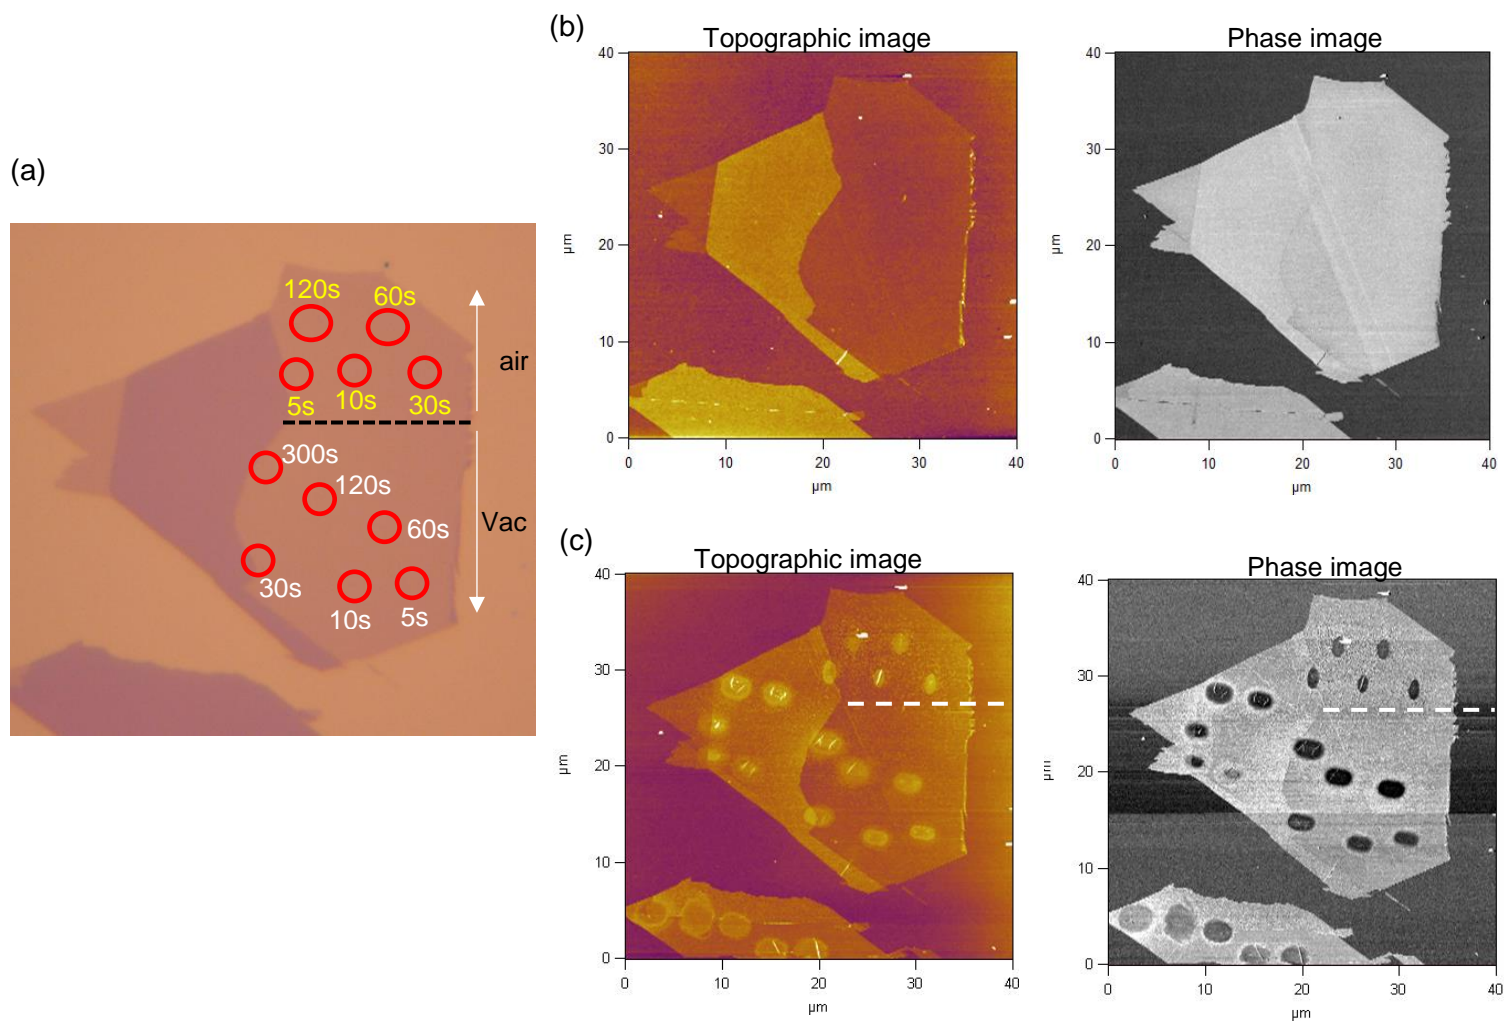

**Figure S9.** (a) Optical image of laser-treated monolayer in vacuum and ambient. AFM measurements of a laser-treated monolayer (b) before treatment (c) after treatment. The dashed line in (c) separates the regions between treatments in air and vacuum, as illustrated in (a).

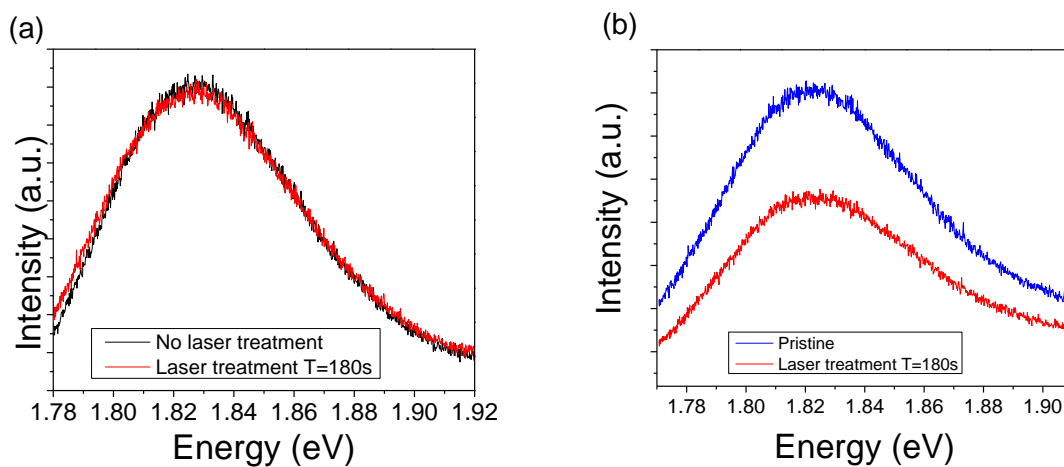

**Figure S10.** PL measurements before and after laser treatment using 0.93 mW for (a) 1L and (b) 5L MoS<sub>2</sub>.

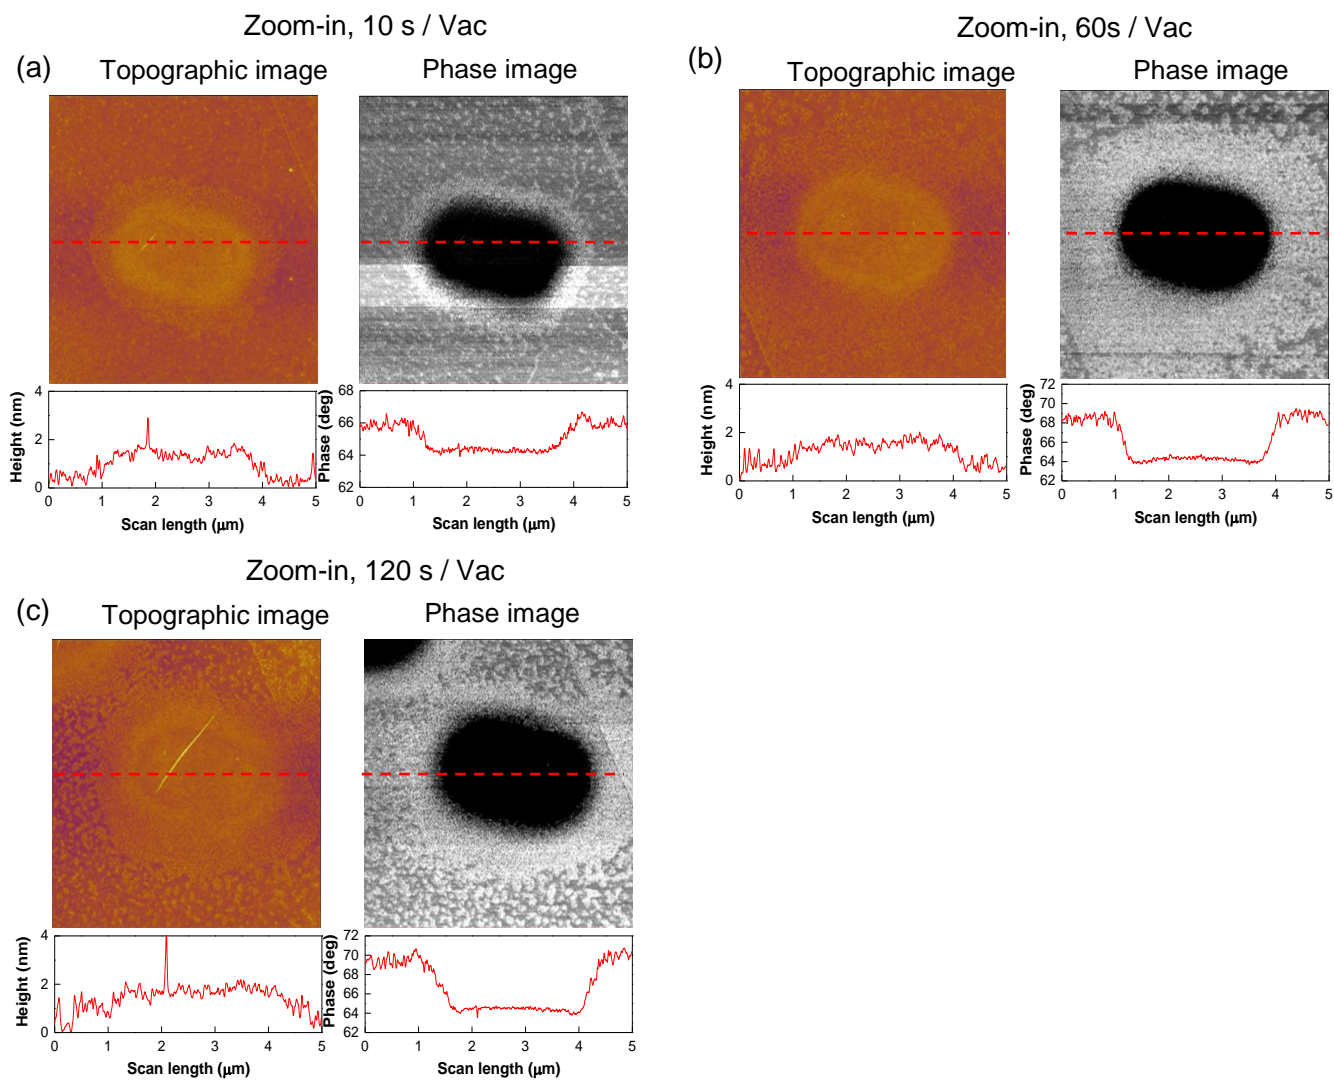

**Figure S11.** Selected laser-treatment spots in vacuum for (a) 10 s treatment (b) 60 s treatment, and (c) 120 s treatment.

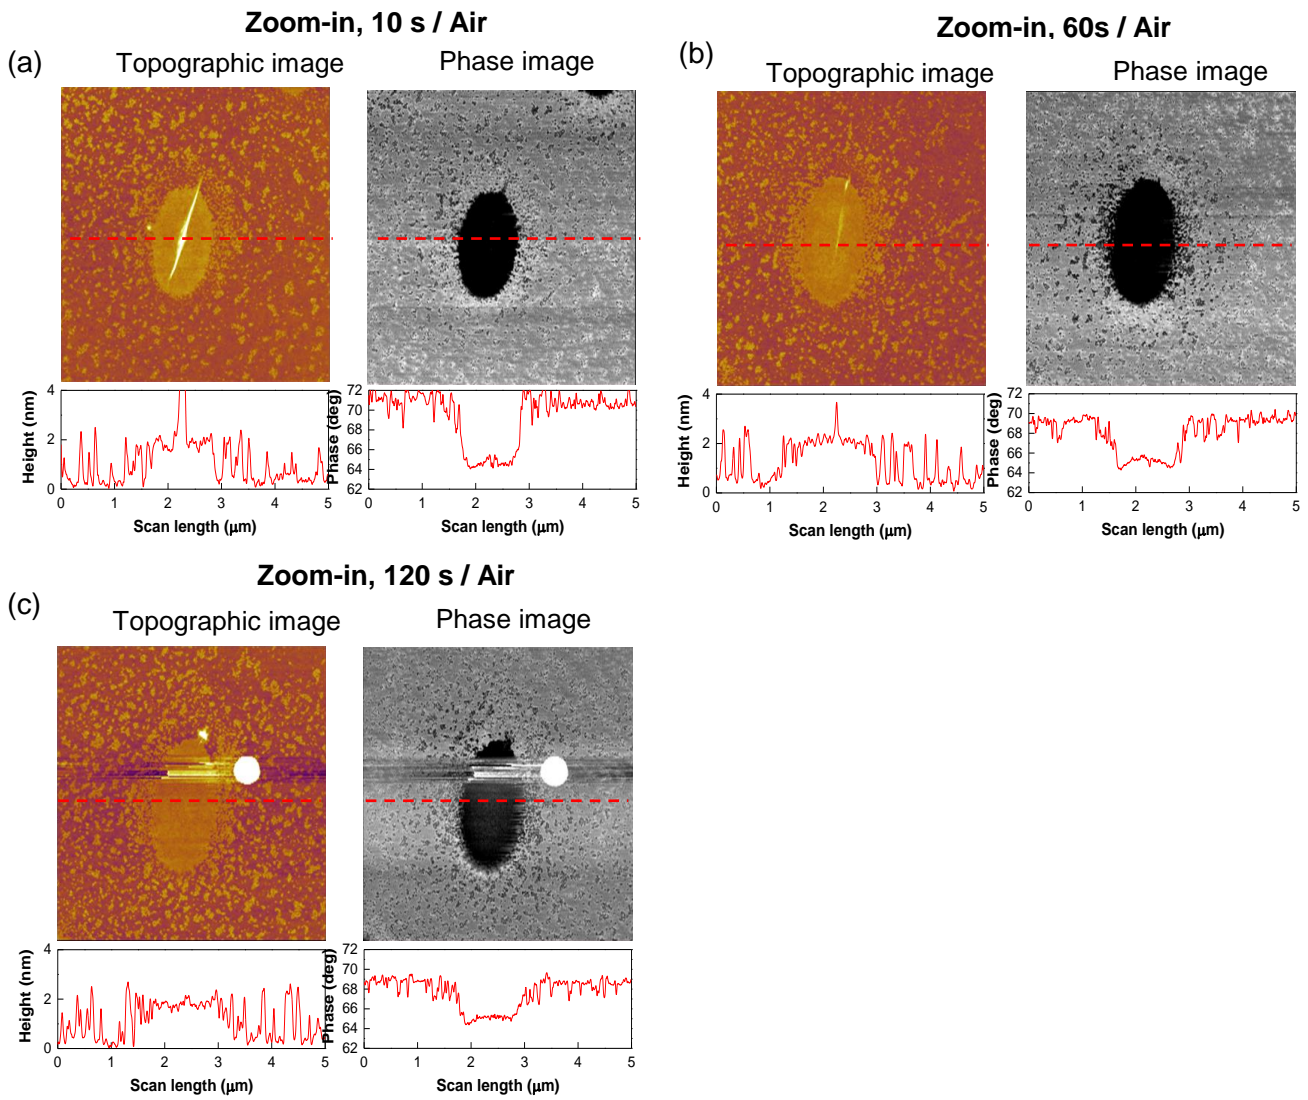

**Figure S12.** Selected laser-treatment spots in ambient for (a) 10 s treatment (b) 60 s treatment, and (c) 120 s treatment.

```

(*This is the importer that W. A. Osborn made for importing the MWCNT images in the Gorham et al. Carbon 2016 papers*)
vmsImgImportFast[fp_] := Module[{str, retVal},
  str = OpenRead[fp];
  Skip[str, Record, 78]; (*sets the number of metadata rows to not import from the .vms file.*)
  retVal = Partition[ReadList[str, Number, 2562], 256];
  (*takes the rest of the rows and turns them into 256 rows with 256 columns *)
  Close[str];
  retVal
];
(*-----*)

(*This section was prepared by JM Gorham and is used for Batch processing all image files in a folder
to be cropped by various, predetermined amounts to a new, uniform size*)
SetDirectory["C:\\Users\\..."]; (*sets the directory the files are extracted from and saved to*)
MoDataset = Map[vmsImgImportFast[#] &, FileNames["*.vms"]];
(*Imports the all images from set directory using the script Will wrote for the MWCNT imaging papers*)
StageDrift = {39, 35, 31, 36, 32, 30, 27, 26, 25, 23, 24, 22, 22, 21, 20, 18, 16, 20, 18, 19, 18, 18, 17, 16, 15,
16, 14, 15, 13, 13, 12, 14, 15, 13, 12, 13, 14, 13, 11, 13, 13, 12, 10, 13, 13, 8, 12, 11, 10, 11, 11, 11, 10, 9
};
(*Manually load a list of drift for images until the drift stops. Each element is the drift calculated
as the absolute value of the difference between where the drift starts and stops, IN PIXELS,
as it appears in Casa. Drifting occurs from right to left over time, as it appears in Casa.*)
StageCorrect = 256 - (StageDrift);
(*Adjust to reflect columns to retain*)
ResizeAllStageCorrect = PadRight[PadRight[StageCorrect, 79, 245], 107, 256];
(*Pads the list to the size of the image set if the image set is bigger than the list of drifting
images. Added values are 256 because no pixels need be cropped*)
PadCropDataset =
ImageData[ImageCrop[(*ImageData is absolutely essential or else the image will not go back into a Casa readable file*)
  ImageCrop[
    Image[MoDataset[[#]], "Byte"], (*Defines the image used*)
    {ResizeAllStageCorrect[[#]], 256}, Left], (*Corrects for the drift by deleting left columns of pixels *)
    {Min[ResizeAllStageCorrect], 256}, Right],
    "Byte" (*Crops all images from the right to obtain a constant size based on the maximum drift observed*)
  ] & /@ Range[1, Length[ResizeAllStageCorrect]];
(*Defines number of processes to be the number of the images defined in the stage drift file*)
(*-----*)

(*This section is used for batch exporting image files to a folder that have already been processed. Currently
set for the above mass cropping script*)
SetDirectory["C:\\Users\\..."]; (*sets the directory the files are extracted from and saved to*)
FirstValues = Map[ReadList[OpenRead[#], String, 39] &, FileNames["*.vms"]];
(*extracts the first 39 values from each image in the selected directory including all energy values*)
Spatialvalues = ReadList[OpenRead["Spatial values.txt"], String, 39];
(*separate file including second 39 values from each image in the selected directory including all
spatial values. NOTE: there are 6 values that are spatial that need to be corrected for each dataset*)
Export["CroppedVacuumImage" <> ToString[#] <> ".txt",
  Join[FirstValues[[#]], Spatialvalues, Flatten[PadCropDataset[[#]]]] & /@ Range[1, Length[ResizeAllStageCorrect]]
];
(*Exports all Cropped XPS images as .txt files with their front 78 lines of metadata*)

```

**Figure S13.** Mathematica Script of the script employed in *i*-XPS to correct for image drift.

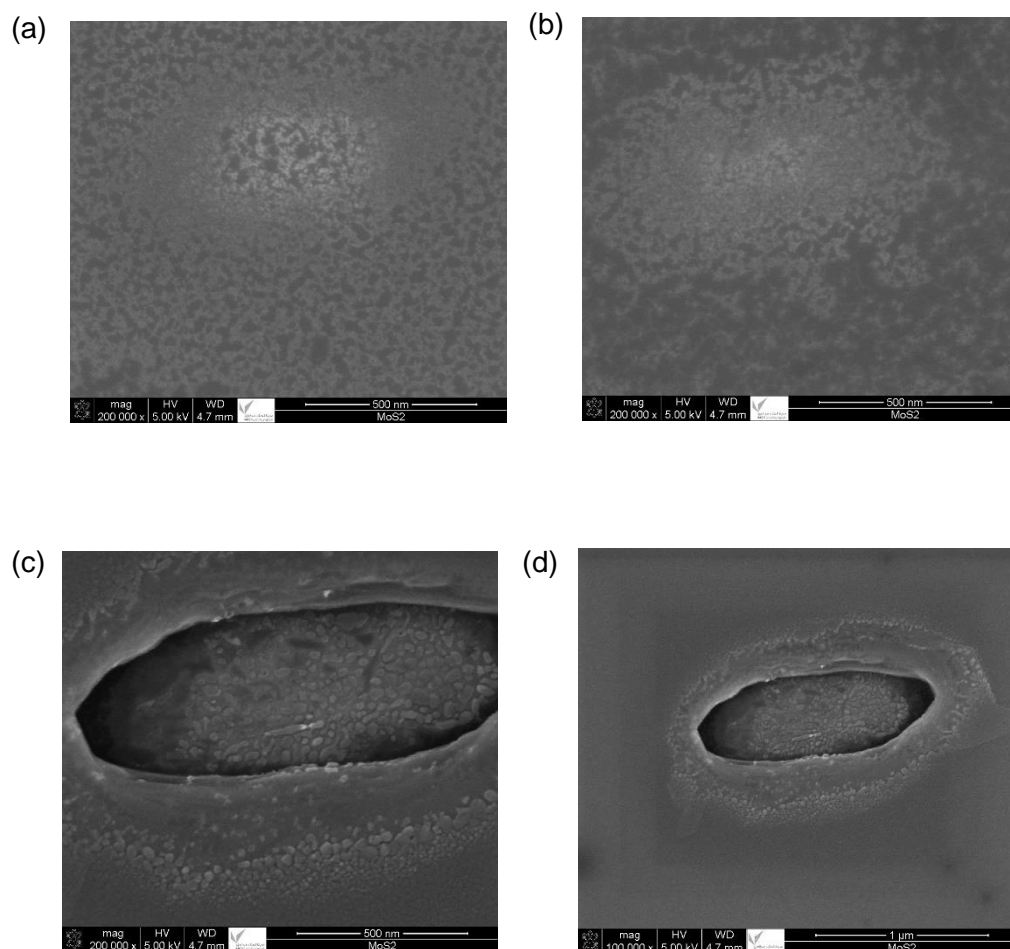

**Figure S14.** SEM images of laser-treated MoS<sub>2</sub> multilayer nanosheet. (a) and (b) SEM images showing particles formed on the surface of the treated spots. Laser treatments were carried out with 0.93 mW of 532-nm laser for 60 s. (c) and (d) SEM images showing laser thinning and the formation of anomalous particles around the edges. These particles vary in size and shape. The elliptical shape of the spot is due to stage drift in the setup. Laser treatments were carried out using 8.3 mW of 532-nm laser for 5 s. For all images, treatments were taken using 100× objective lens.

**Table S1.** Atomic percentages attributed to each chemical or elemental species for different masks or ROIs (underlined in the case of multiple elements).

|         | Mask/ROI ID             | <u>Mo<sub>ox</sub></u> | <u>Mo<sub>sulfide</sub></u> | <u>O<sub>Mo</sub></u> | <u>O<sub>Si</sub></u> | <u>S<sub>sulfide</sub></u> | <u>Si</u> |
|---------|-------------------------|------------------------|-----------------------------|-----------------------|-----------------------|----------------------------|-----------|
| Ambient | MoS <sub>2</sub> laser  | 8                      | 0                           | 16                    | 51                    | 1                          | 24        |
|         | MoS <sub>2</sub> native | 0                      | 4                           | 0                     | 58                    | 8                          | 30        |
|         | SiO <sub>2</sub>        | 0                      | 0                           | 0                     | 63                    | 0                          | 37        |
|         |                         |                        |                             |                       |                       |                            |           |
| Vacuum  | MoS <sub>2</sub> laser  | 1                      | 7                           | 2                     | 50                    | 12                         | 28        |
|         | MoS <sub>2</sub> native | 0                      | 4                           | 1                     | 56                    | 7                          | 33        |
|         | SiO <sub>2</sub>        | 0                      | 0                           | 1                     | 63                    | 0                          | 36        |

The results presented in Table S1 are presented without any error and are intended to be informational and estimates only. This is a result of one measurement, which precludes any type A error associated with multiple measurements in attempts to assess the heterogeneity across one specimen or between multiple specimens. With respect to type B uncertainty, there is insufficient information and calibration checks for all factors to accurately assign an uncertainty. Some of the factors not accounted for include knowledge of the variability in the intensity as a function of position on the detector, which is important due to shifts in the image region as a function of stage drift as well as energy dependent shifts. Attenuation in photoelectron intensity from the substrate was also not accounted for which may have resulted in a suboptimal rsf assignment and would be another source of error. Therefore, since the only error we have access to is an idea of the uncertainty associated with the fit, which would grossly underestimate the true error, we chose to only use these values as rough estimates with no assignment of error.
